# Supplementary material for: Preparation of nanoporous molybdenum film by dealloying an immiscible Mo–Zn system for hydrogen evolution reaction
Source: Royal Society of Chemistry journal article supplement (doi:10.1039/c5ra24426a), 2016-01-01
Supplement: c5ra24426a1.pdf [file c5ra24426a1.pdf]

## Supporting Information

### **Preparation of Nanoporous molybdenum film by Dealloying Immiscible Mo-Zn System for hydrogen evolution reaction**

Zixin He, Yuan Huang\* and Fang He\*

Tianjin Key Laboratory of Composite and Functional Materials, School of Material Science and Engineering, Tianjin University, Tianjin 300072, PR China.

E-mail: profhy\_tju@sina.cn; tju\_hefang@sina.cn.

Content.

S1. Mo-Zn phase diagram

S2. Auger depth profiles of annealed Mo/Zn bilayered sample

S3. A high magnification TEM view of Zn layer after annealing

S1. Mo-Zn phase diagram

Mo-Zn phase diagram is illustrated in Fig. S1. Mo has negligible solubility even in liquid zinc.

S2. Auger depth profiles of annealed Mo/Zn bilayered sample

Typical Auger depth profiles of Mo, Zn elements in the as-prepared Mo/Zn bilayered samples are illustrated in Fig. S1. It can be observed that when the layered samples were heated at 400°C, which was close to the melting point of Zn (419.53°C), a broad Mo-Zn coexistence region appeared, indicating that there is an obvious diffusion behavior occurred between Mo and Zn elements during annealing and the Mo-Zn interface had formed.

S3. A high magnification TEM view of Zn layer

A high magnification TEM view of Zn layer is shown in supplement material S2,  
the grain sizes of Zn are in the range of 15-50nm.

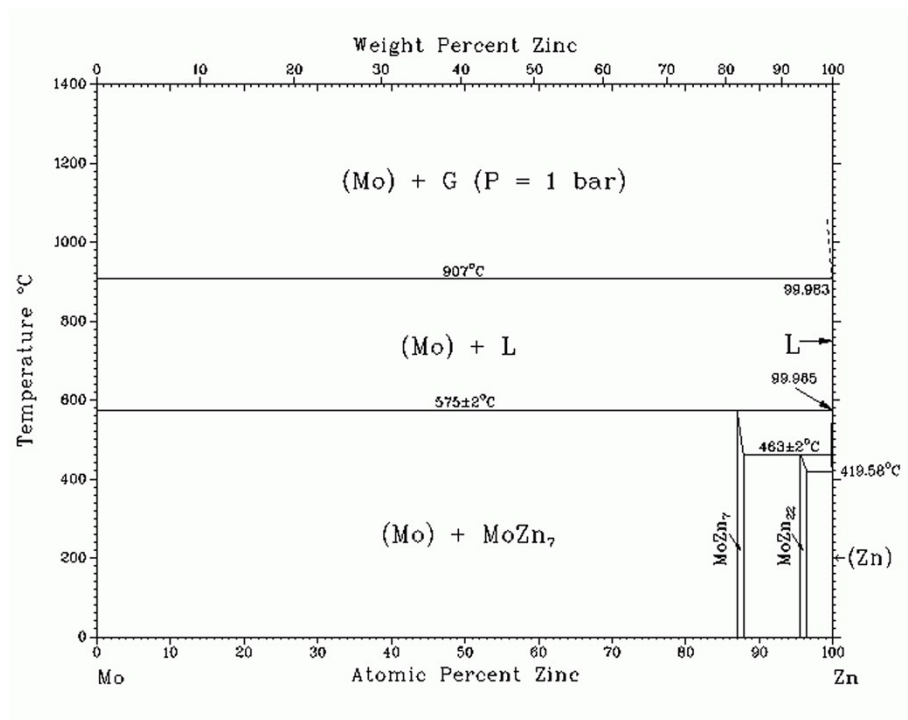

Figure S1 Mo-Zn phase diagram..

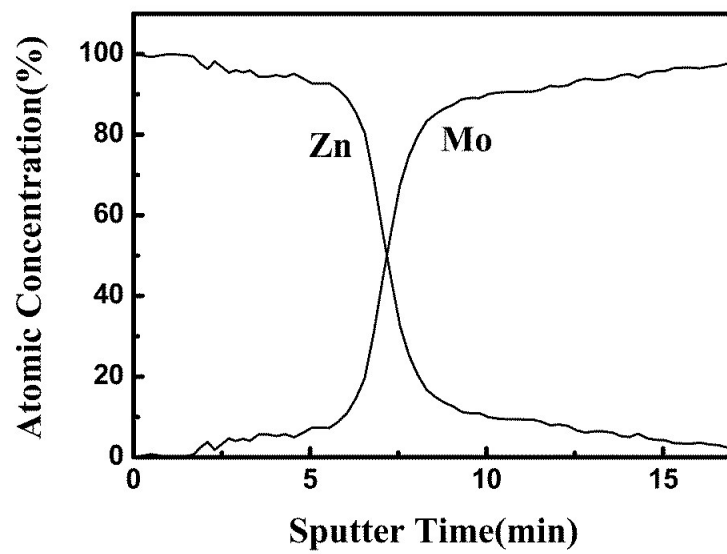

Figure S2 AES depth profiles of Mo-Zn bilayered sample annealed at 400°C for 5h.

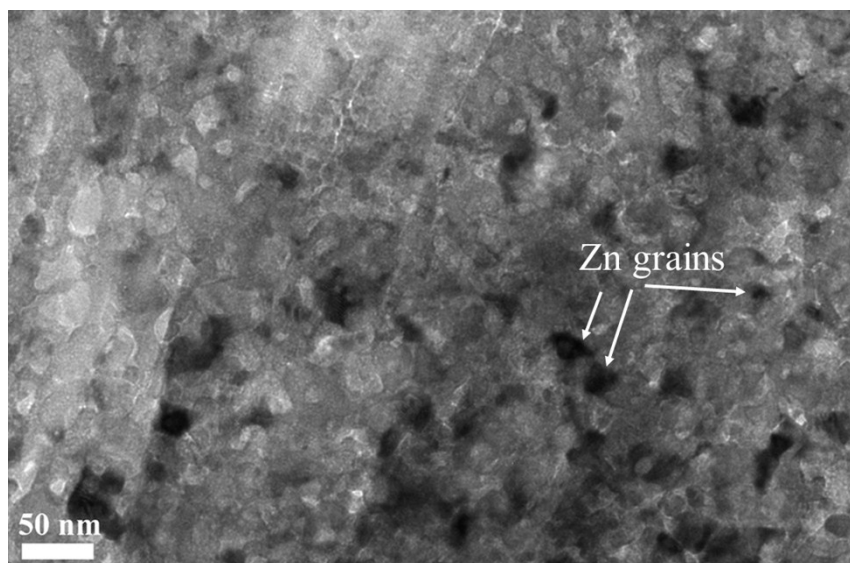

Figure S3 High magnification TEM view of nanocrystalline Zn layer after annealing.
